# Supplementary material for: Assessment of the quality of DNA from various formalin-fixed paraffin-embedded (FFPE) tissues and the use of this DNA for next-generation sequencing (NGS) with no artifactual mutation
Source: PubMed Central journal article supplement (PMC5428915; doi:10.1371/journal.pone.0176280), 2017-05-12
Supplement: pone.0176280.s001.pdf [file pone.0176280.s001.pdf]

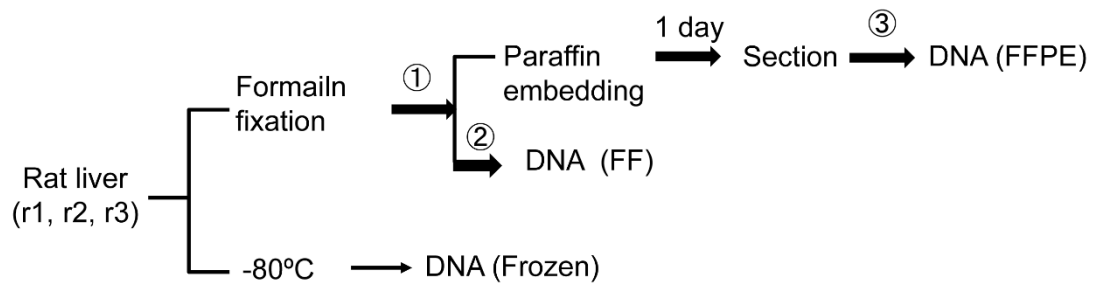

| ① Fixation | ② -80°C (FF) | ③ -80°C (FFPE) |
|------------|--------------|----------------|
| 1 day      | 4 days       | 13 days        |
| 2 days     | 3 days       | 12 days        |
| 3 days     | 2 days       | 11 days        |
| 4 days     | 1 day        | 10 days        |

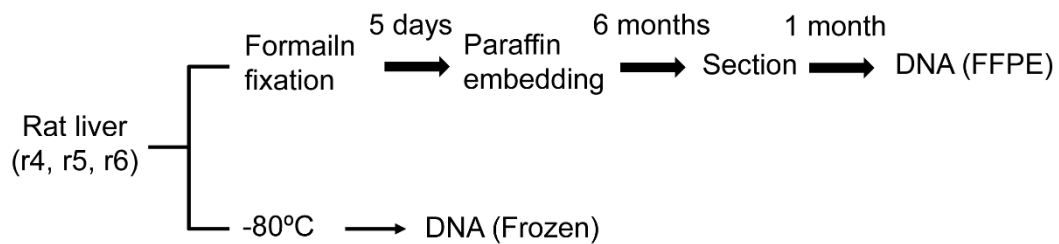

**S1 Fig. Matched liver specimens from 6 rats**

The rat liver specimens in this study were prepared from 6 rats (r1 to r6). Three sets of fresh-frozen tissue, FF and FFPE DNA samples were prepared from 3 rat livers (r1, r2, r3), and 4 fixation periods were tested (1, 2, 3 and 4 days). To adjust DNA extraction for the same day, storage periods at -80°C for the FF and FFPE tissues are indicated in a table. Another three sets of frozen tissue and FFPE DNA samples were prepared from 3 rat livers (r4, r5, r6) for testing a long period of fixation and storage.
