# Supplementary material for: Assessment of the quality of DNA from various formalin-fixed paraffin-embedded (FFPE) tissues and the use of this DNA for next-generation sequencing (NGS) with no artifactual mutation
Source: PubMed Central journal article supplement (PMC5428915; doi:10.1371/journal.pone.0176280), 2017-05-12
Supplement: pone.0176280.s002.pdf [file pone.0176280.s002.pdf]

**S1 Table. Primer sequences and TaqMan IDs used in this study**

| Experiment                            | Gene                     | Primer Sequence (5'-3') <sup>a</sup>                        | Annealing (°C)     |
|---------------------------------------|--------------------------|-------------------------------------------------------------|--------------------|
| TaqMan Assay                          | <i>GAPDH</i>             | Hs02758991_g1                                               | 60                 |
|                                       | <i>Gapdh</i>             | Rn01775763_g1                                               | 60                 |
| Fragmentation<br>PCR                  | <i>Tp53</i><br>301 bp    | CCTCAATAAGCTGTTCTGCC<br>AGTCTGCCTGTCGTCCAGAT                | 60                 |
|                                       | <i>Tp53</i><br>952 bp    | CCTCAATAAGCTGTTCTGCC<br>GCCTCCACCTTCTTTGTCCT                | 60                 |
| Sanger<br>Sequencing                  | <i>CHEK2</i>             | CCCAGGAGTGGTAGGTCTCA<br>GCCTCTCTTGCTGAACCAAT                | 60/65 <sup>c</sup> |
|                                       | <i>FGFR3</i>             | ACTGTCTGGGTCAAGGATGG<br>AGCTGTAGGCCCCGGAGT                  | 60                 |
|                                       | <i>MAG1</i>              | CAGCCACATCAACAGGAAGA<br>CTCAGATTTACCCCATGCT                 | 60                 |
| SYBR Green<br>Allele-specific<br>qPCR | <i>ERCC2</i>             | GCTCATGCTTCCGTCTG(C/G) <sup>b</sup><br>TTACCTTTGGCGTAGGTGCT | 65                 |
|                                       | <i>CARD11</i>            | CCAAATCTCTTTGGCCTG(T/A)<br>GAGGGGACCTTTCAGCAGTT             | 65                 |
|                                       | <i>EPHA3</i>             | GGTTGGGCCACAGAAGAAG<br>CCACCACTTCCGTCCAG(A/G)               | 65                 |
|                                       | <i>MTOR</i>              | TCTATCCAGGCCACTCTCTGA(C/T)<br>ATGCGGATCTCCTTGTGCT           | 66                 |
|                                       | <i>FLT4</i>              | CAAGTGTTCCACCCAAAGAAA<br>CTCCTGCACAGCTACCC(C/A)             | 65                 |
|                                       | <i>FANCD2</i>            | TAAAACAAGGAAAGCAAAGTGG(A/G)<br>TATGTCAATCCCCAGAAGCA         | 65                 |
|                                       | <i>BCYRN1 /<br/>TAF1</i> | AGAAATGGGTGAGTGGAGGA<br>CCTCAAACAAAAAAGTGAGACT(C/A)         | 65                 |
|                                       | <i>Kras_ref</i>          | TCCACAAAGTGATTCTGAATT<br>CGTAGGATCATATTCATCCACAAA           | 62                 |

|                                          |                    |                                                   |                      |
|------------------------------------------|--------------------|---------------------------------------------------|----------------------|
| SYBR Green<br>Allele-specific<br>qPCR    | <i>Kras</i> (c.34) | ACTTGTGGTAGTTGGAGCT(G/A)<br>TCCACAAAGTGATTCTGAATT | 62                   |
|                                          | <i>Kras</i> (c.35) | CTTGTGGTAGTTGGAGCTG(G/A)<br>CCACCAAGTGATTCTGAATTA | 62                   |
|                                          | <i>Kras</i> (c.38) | GTGGTAGTTGGAGCTGGTG(G/A)<br>TCCACAAAGTGATTCTGAATT | 65                   |
| TaqMan<br>Mutation<br>Detection<br>Assay | <i>KRAS_ref</i>    | Hs00000174_rf                                     |                      |
|                                          | <i>KRAS</i> (c.34) | Hs00000115_mu                                     | 58 (5),              |
|                                          | <i>KRAS</i> (c.35) | Hs00000121_mu                                     | 60 (45) <sup>d</sup> |
|                                          | <i>KRAS</i> (c.38) | Hs00000131_mu                                     |                      |

<sup>a</sup> Upper, forward primer; lower, reverse primer.

<sup>b</sup> The first nucleotide in parentheses is the wild-type allele, and the second is the mutant allele.

<sup>c</sup> PCR was performed using 2 annealing temperatures appropriate for each sample: 60°C for fresh-frozen tissue DNA and 65°C for FFPE DNA due to better PCR condition for Sanger Sequencing.

<sup>d</sup> MDA was performed using 2 annealing temperatures: 58°C for an initial 5 cycles and 60°C for the ensuing 45 cycles.
