# Supplementary material for: Assessment of the quality of DNA from various formalin-fixed paraffin-embedded (FFPE) tissues and the use of this DNA for next-generation sequencing (NGS) with no artifactual mutation
Source: PubMed Central journal article supplement (PMC5428915; doi:10.1371/journal.pone.0176280), 2017-05-12
Supplement: pone.0176280.s004.pdf [file pone.0176280.s004.pdf]

**S3 Table. Rat *Kras* mutation analysis by allele-specific qPCR**

| No. | Genotype |     | FFPE             | Frozen           |
|-----|----------|-----|------------------|------------------|
|     |          |     | Allele Frequency | Allele Frequency |
| r1  | c.34     | G>A | 0.0046           | 0.0036           |
|     | c.35     | G>A | 0.0116           | 0.0082           |
|     | c.38     | G>A | 0.0094           | 0.0151           |
| r2  | c.34     | G>A | 0.0053           | 0.0066           |
|     | c.35     | G>A | 0.0113           | 0.0095           |
|     | c.38     | G>A | 0.0148           | 0.0157           |
| r3  | c.34     | G>A | 0.0029           | 0.0068           |
|     | c.35     | G>A | 0.0108           | 0.0087           |
|     | c.38     | G>A | 0.0123           | 0.0158           |
| r4  | c.34     | G>A | 0.0035           | 0.0034           |
|     | c.35     | G>A | 0.0097           | 0.0128           |
|     | c.38     | G>A | 0.0078           | 0.0969           |
| r5  | c.34     | G>A | 0.0043           | 0.0028           |
|     | c.35     | G>A | 0.0086           | 0.0107           |
|     | c.38     | G>A | 0.0167           | 0.0119           |
| r6  | c.34     | G>A | 0.0038           | 0.0047           |
|     | c.35     | G>A | 0.0071           | 0.0098           |
|     | c.38     | G>A | 0.0192           | 0.0111           |

Allele-specific qPCR of 3 mutations of the *Kras* gene was performed using 6 pairs of FFPE and frozen tissue DNA. The allele frequency was calculated as described in Materials and Methods.
