# Supplementary material for: Assessment of the quality of DNA from various formalin-fixed paraffin-embedded (FFPE) tissues and the use of this DNA for next-generation sequencing (NGS) with no artifactual mutation
Source: PLOS journal article supplement (doi:10.1371/journal.pone.0176280), 2017-05-12
Supplement: S3 (10.1371/journal.pone.0176280.s003) [file journal.pone.0176280.s003]

**S2 Table. Human *KRAS* mutation analyses by amplicon sequencing and MDA**

| No. | Genotype | FFPE     |                 |               | Frozen   |                 |               |
|-----|----------|----------|-----------------|---------------|----------|-----------------|---------------|
|     |          | Coverage | Allele Coverage | qPCR          | Coverage | Allele Coverage | qPCR          |
|     | c.34 G>A |          | 0               | <b>6.0E-6</b> |          | 0               | <b>7.7E-7</b> |
| 16  | c.35 G>A | 212      | 0               | <b>1.3E-5</b> | 893      | 0               | <b>3.9E-6</b> |
|     | c.38 G>A |          | 1               | <b>7.4E-7</b> |          | 0               | <b>8.5E-8</b> |
|     | c.34 G>A |          | 0               | <b>1.7E-7</b> |          | 0               | <b>9.7E-8</b> |
| 17  | c.35 G>A | 1036     | 2               | <b>8.6E-7</b> | 435      | 0               | <b>6.5E-7</b> |
|     | c.38 G>A |          | 0               | <b>1.2E-7</b> |          | 0               | <b>2.5E-7</b> |
|     | c.34 G>A |          | 1               | <b>4.1E-7</b> |          | 0               | <b>1.1E-6</b> |
| 18  | c.35 G>A | 272      | 0               | <b>1.3E-5</b> | 592      | 1               | <b>1.3E-5</b> |
|     | c.38 G>A |          | 0               | <b>5.9E-6</b> |          | 0               | <b>2.8E-5</b> |
|     | c.34 G>A |          | 0               | <b>9.7E-7</b> |          | 0               | <b>6.0E-6</b> |
| 19  | c.35 G>A | 220      | 0               | <b>6.1E-6</b> | 572      | 0               | <b>4.2E-6</b> |
|     | c.38 G>A |          | 0               | <b>1.2E-6</b> |          | 0               | <b>1.7E-6</b> |
|     | c.34 G>A |          |                 | <b>3.4E-6</b> |          |                 | <b>1.4E-7</b> |
| 20  | c.35 G>A |          |                 | <b>3.4E-6</b> |          |                 | <b>3.1E-6</b> |
|     | c.38 G>A |          |                 | <b>3.4E-6</b> |          |                 | <b>2.8E-6</b> |
|     | c.34 G>A |          |                 | <b>2.3E-6</b> |          |                 | <b>1.3E-6</b> |
| 21  | c.35 G>A |          |                 | <b>9.3E-6</b> |          |                 | <b>1.1E-5</b> |
|     | c.38 G>A |          |                 | <b>2.3E-6</b> |          |                 | <b>1.6E-7</b> |

Amplicon sequencing was performed for 4 pairs of FFPE and frozen tissue DNA. MDA was performed for 6 pairs of FFPE and frozen tissue DNA. qPCR was determined by the ratio of mutant PCR to *KRAS* reference PCR, as described in Materials and Methods.
